# Supplementary material for: Variation in clinical judgment about client needs: A think-aloud study among home care nurses
Source: Research Square preprint supplement (doi:10.21203/rs.3.rs-6463667/v1), 2025-06-03
Supplement: Supplementary file 1 [file 2bb6a5de684decca29b7f974.docx]

**Appendix 2: Coding Scheme for the Deductive Analysis of the Think-Aloud Interviews**

| Name | Description |
| --- | --- |
| **Nursing Process (18)** | Six phases in the nursing process, including the clinical judgment |
| 1. Assessment | Anamnesis |
| 2. Diagnosis | Nursing problems |
| 3. Goal Setting | Defining goals |
| 4. Planning Interventions | Defining interventions |
| 5. Evaluation | Evaluating results |
| 6. Clinical Judgment (4) | Decision on the amount, type, and duration of home care |
| **Clinical Reasoning Skills (5)** | A complex cognitive process that employs formal and informal thinking strategies to gather and analyse patient information, evaluate its significance, and weigh alternative actions |
| Assessing systematically and comprehensively | Utilising an organised, systematic approach that enhances one’s ability to discover all the information to fully understand a person's health status |
| Checking accuracy and reliability | Collecting additional data to verify whether the information is correct and complete |
| Clustering related cues | Grouping data to identify patterns and relationships among the data |
| Determining a comprehensive plan or evaluating and updating the plan | Ensuring that priority problems, corresponding outcomes, and interventions are recorded in the patient record, keeping the plan up-to-date |
| Determining client-centred outcomes | Describing precisely what results will be observed in the patient to demonstrate the expected benefits of care at a specific point in time |
| Determining individualised interventions | Identifying specific nursing actions tailored to the patient's needs, designed to (1) prevent, manage, and eliminate problems and risk factors; (2) reduce the likelihood of undesired outcomes and increase the likelihood of desired outcomes; and (3) promote health and independence. |
| Diagnosing actual and potential problems | Ensuring that the patient’s actual and potential problems are accurately identified based on evidence from the health assessment and patient records. |
| Distinguishing relevant from irrelevant | Determining what information is pertinent for understanding the situation at hand and what information is irrelevant. |
| Distinguishing normal from abnormal and identifying signs and Symptoms | Analysing patient data to determine what falls within the normal range and what is outside it, then deciding whether abnormal data may indicate specific problems |
| Evaluating and correcting thinking | Reflecting on thinking for safety and improvement—for example, identifying flaws, assessing whether thinking is focused and sufficiently detailed, and making necessary adjustments |
| Identifying assumptions | Recognising when something is taken for granted or presented as fact without supporting evidence |
| Identifying missing information | Recognising gaps in data collection and seeking information to fill those gaps |
| Identifying patterns | Determining what patterns of health, illness, or function are indicated by patient data |
| Making inferences (drawing valid conclusions) | Making deductions or forming opinions that logically follow based on patient cues (subjective and objective data) |
| Promoting health by Identifying and managing risk factors | Maximising well-being by detecting and managing factors that evidence suggests contribute to health problems (e.g., sedentary lifestyles contribute to many health issues) |
| Recognising inconsistencies | Identifying when pieces of information contradict each other |
| Setting priorities | Setting priorities is defined in two ways: (1) differentiating between problems requiring immediate action and those needing subsequent action, and (2) determining which problems must be addressed in the patient record. |
| **Influencing Factors (10)** | |
| The client’s wishes and preferences | |
| The presence of different types of care providers in the region | |
| The client’s capacity for self-reliance and self-direction | |
| Other disciplines involved in the client’s care | |
| The availability of technological tools in an organisation | |
| The nurses’ attitudes and beliefs | |
| The availability of the client’s network | |
| The nurses’ years of experience | |
| The client’s ability to learn | |
| The region where the client is living | |
| The client’s number of nursing diagnoses | |
| The presence of multiple home care providers in the region | |
| The client’s living circumstances | |
| The client’s culture or ethnicity | |
| The capacity of personnel available | |
| The home care nurse’s knowledge of guidelines, standards, and scientific evidence | |
