# Supplementary material for: Variation in clinical judgment about client needs: A think-aloud study among home care nurses
Source: Research Square preprint supplement (doi:10.21203/rs.3.rs-6463667/v1), 2025-06-03
Supplement: Supplementary file 2 [file 2da528e8ce43a37589d99233.docx]

**Appendix 1**

**Interview guide**

The home care nurse is invited to participate in the interview via an online link in an Outlook appointment. The participant selects the date for the appointment through an invitation via a date picker.

***Script:***

Prepare the video

Open Teams

Getting to know the participant

- “Hello, may we introduce ourselves to one another?”
- “Thank you again for participating in this interview.”

Ask again permission to record the interview and use the data for research.

- “Do you agree to record this interview and use the data for this study?”

Check whether turning off cameras is desirable for the interviewee.

- “Participation in this interview is anonymous.”
- “I have checked the working conditions form in advance; can you join this interview without disturbing anyone? Are there any questions or additions that may be important to your situation?”
- “Are there any other questions?”
- “Would you like to practice thinking out loud?”
- “What signal do we agree on when there are breaks, and you are silent for too long?” Shall I ask you to speak your thoughts out loud at such a moment?”
- “I will disturb your thoughts/work as little as possible and only then when you silently think for too long.”
- “If I have any questions, I will ask them at the end of the interview.”
- “If you want to take notes while watching the video, just do so.”
- “Are you ready to start and watch the video?”
- “You will watch a recording of Nicole Alders made at her home. Her ex-husband has asked your organisation to send a home care nurse to visit and arrange care for her. He mentioned that she agrees to this and is expecting your visit. He expresses concern about her; she is mishandling her medication, drinking excessively, and has Parkinson's disease.”
- “Feel free to take notes if you normally do.”

Start the video.

Do not interrupt the participant while watching the video unless the participant has been silent for a few seconds.

- “What are you thinking at the moment? Can you think aloud, please?”

Continued script after watching the film:

- “Can I start the recording?”

Start recording: You have now activated a shortcut to capture a screen recording when you press the Windows and G keys on your keyboard simultaneously. The Xbox Game Bar will now launch. Click the dot in the top left panel to start recording. A timer will become visible on the right side of the screen.

Allow recording to continue until the final conversation.

When you have finished recording, click the blue stop button next to the timer on the right.

Your recording will now be saved to the Captures folder in your profile folder: C:\Users\YOURUSERNAME\Videos\Captures

- “The recording has started.”
- The question/assignment is: “You have now watched this film with the client. May I ask you to start assessing the needs as always? If you want to use pen and paper or enter things into the computer, do that as you are used to doing. I would like you to express everything you do or want to do, or think about everything that comes to your mind, speak out loud, and share it with me. We want to get insight into your thoughts while you assess the needs of Nicole and how you decide on her needs. Do not hesitate to say everything during your assessment process because there is no right or wrong.”

Follow-up after completing the task:

Any in-depth questions that may be asked may start with, “Can you tell me more about… You indicated at…., can you explain what you mean by that?”

If there are no in-depth questions, the recording can be stopped.

Stop recording.

Question: Have you already completed the online questionnaire? Are you not done yet? I will send you a link with a request to complete it.

After the interview, it is announced that the research results will be shared after analysis and that the participants will be contacted personally to receive the results and to attend the symposium.

Request address details to send a gift voucher.

- Close interview: “Thanks for participating!”
