# Supplementary material for: Variation in clinical judgment about client needs: A think-aloud study among home care nurses
Source: Research Square preprint supplement (doi:10.21203/rs.3.rs-6463667/v1), 2025-06-03
Supplement: Supplementary file 3 [file c8208775c122f41855954434.docx]

**Appendix 3: The order in which the home care nurses progress through the different phases of the nursing process and the frequency of phase transitions.**

| **Participant** | **Follow-up of Phases** | **1. Assessment** | **2. Diagnosis** | **3. Goal-Setting** | **6. Clinical Judgment** | **4. Interventions** | **5. Evaluation** |
| --- | --- | --- | --- | --- | --- | --- | --- |
| 1 A | 1-2-1-4-2-1-4-2-4-6-4-1-6-5-6-5-4-6-5-2-6-5-1 | 5 times | 4 times | 0 times | 5 times | 5 times | 4 times |
| 2 B | 1-3-4-1-4-3-1-4-1-4-1-4-1-4-3-1-2-4-1-4-1-2-1-2-4-2-1-2-1-4-1-3-1--6-4-1-6-3-6-4-6-4-6-5-1-5-6-5-6-5-1-5-1-4-5-4-5-4-1-6-4-5-4-5-4-3-4-5-6-5-6-4-5-6-1-5-4-5-4 | 20 times | 5 times | 6 times | 11 times | 22 times | 14 times |
| 3 C | 1-2-1-2-4-3-1-2-3-1-4-1-4-1-4-5-3-4-6-3-4-2-5-4-5-6-5-6-5-1-5-3-4-3-2-1-5-2-4-5-6-3 | 8 | 6 | 7 | 4 | 9 | 8 |
| 4 D | 1-4-1-4-1-5-4-5-1-4-5-1-5-1-4-6-4-3-1-5-1-3-4-6-5-1-4-5-6-5-1-5-6-4-1-5-4-5-4-1-5-1-4-1-5-6-5-1-6-5-6-5-5-2 | 15 | 1 | 2 | 7 | 12 | 17 |
| 5 E | 1-4-1-4-6-5-1-5-6-4-1-5-6-1-2-1-4-1-4-2-5-4-2 -4-5-4-1-4-1-4-5-6-5-3-4-3-1-4-1-4-2-1-2-1-4-1-5-1-5-2-4-1-2-5-4-1-6-5-6-5-1-6-5-4-1-4-6-1-5-6-5-1-5-1-5-4-1- | 23 | 7 | 2 | 9 | 19 | 17 |
| 6 F | 1-2-1-4-1-6-1-5-4-2-1-5-1-4-5-1-4-3-5-2-4-6-2-4-2-5-4-1-4-5-6-4-6-4-6-4-2-5-6-5-4-2-1-5-4-5-6-5-4-5-4-2-3-1-2-5-6 | 10 | 9 | 2 | 8 | 15 | 13 |
| 7 G | 1-4-1-2-4-1-4-1-4-5-2-5-2-4-2-5-2-4-2-5-2-3-2-3-2-1-2-1-2-1-2-4-3-2-4-1-2-4-2-1-2-4-5-1-2-4-2-6-4-6-4-5-6-1-5-6-5-4-3-5-5-3-5-1-5-6-4-5-1- | 13 | 18 | 5 | 5 | 15 | 13 |
| 8 C | 1-2-1-2-1-2-1-2-1-4-6-5-4-2-4-5-4-6-5-6-5-4-5-6-5-4-5-2-6-5-4-3-6-2-5-3-5- | 5 | 7 | 2 | 6 | 7 | 10 |
| 9 H | 1-2-1-2-6-5-4-6-5-4-6-1-4-1-4-2-4-2-1-6-4-5-4-3-5-3-5-6-2-5-2-1-5-3-4-3-2-5-4-3-1-4-3-6-3-6-1-4-3-1-2-6-5-6-5-6-5-3-5-2-1-5-2-4-2-5-4-6-2-6-1-4-6-1-4-5 | 12 | 12 | 9 | 13 | 15 | 15 |
| 10 H | 2-1-4-5-1-4-1-4-1-3-5-4-2-5-6-3-4-6-2-3-5-4-1-4-2-1-5-6-5-4-5-3-2-4-6-5-2-1 | 7 | 6 | 4 | 4 | 9 | 8 |
| 11 I | 1-5-1-2-1-3-4-1-4-3-6-3-4-3-5-3-4-5-3-1-2-5-4-6-4-3-1-6-4-6-5-6-4-6-4-6-4-6-5-6-3-1-1-5-1-3-1-4-1-5-6-5-6-6-3-6-5 | 11 | 2 | 10 | 13 | 11 | 10 |
| 12 F | 1-2-1-4-2-5-3-1-5-2-1-4-3-1-4-2-4-5-4-5-1-5-4-5-4-1-5-1-5-4-1-4-1-4-3-1-5-1-5-2-1-3-5-1-6-5-2-5-3-2-1-5-4-1-4-1-4-5-4-1-5-2-4-5-4-2-4-5-4-1-4-2-1-4-5-3-6-6-4-1-6-1-4-6-5-6-5-4-5-6-5-6-1-4-6-5-5-4-1-5-6-4-5-4-6-2-4-5-6-5-3-1-3-5-2-4-2-5 | 25 | 13 | 8 | 12 | 29 | 31 |
| *Range of times they switch phases** |  | *5 – 25 times* | *1 – 18 times* | *0 - 10 times* | *4 – 13 times* | *5 – 29 times* | *4 – 31 times* |
| *Average on phases used** |  | *13 times* | *8 times* | *5 times* | *8 times* | *14 times* | *13 times* |
